# Supplementary material for: CsIVP functions in vasculature development and downy mildew resistance in cucumber
Source: PubMed Central journal article supplement (PMC7117775; doi:10.1371/journal.pbio.3000671), 2020-03-23
Supplement: pbio.3000671.s023.pdf [file pbio.3000671.s023.pdf]

Fig 2C

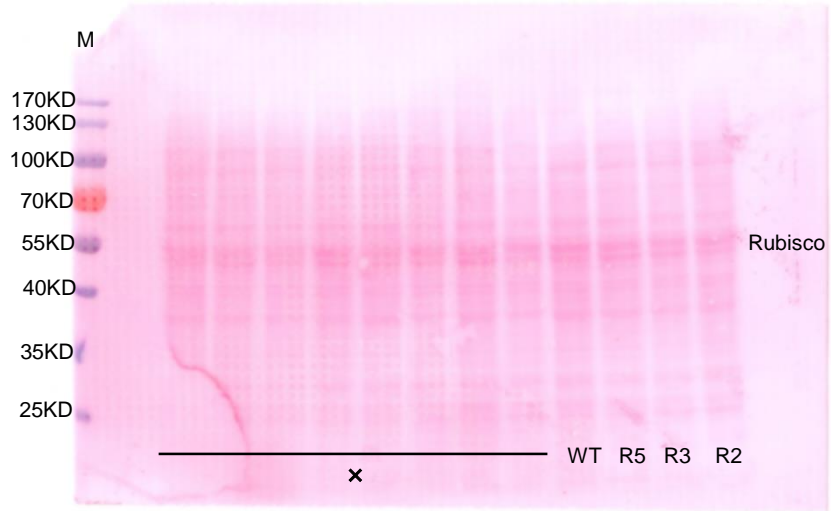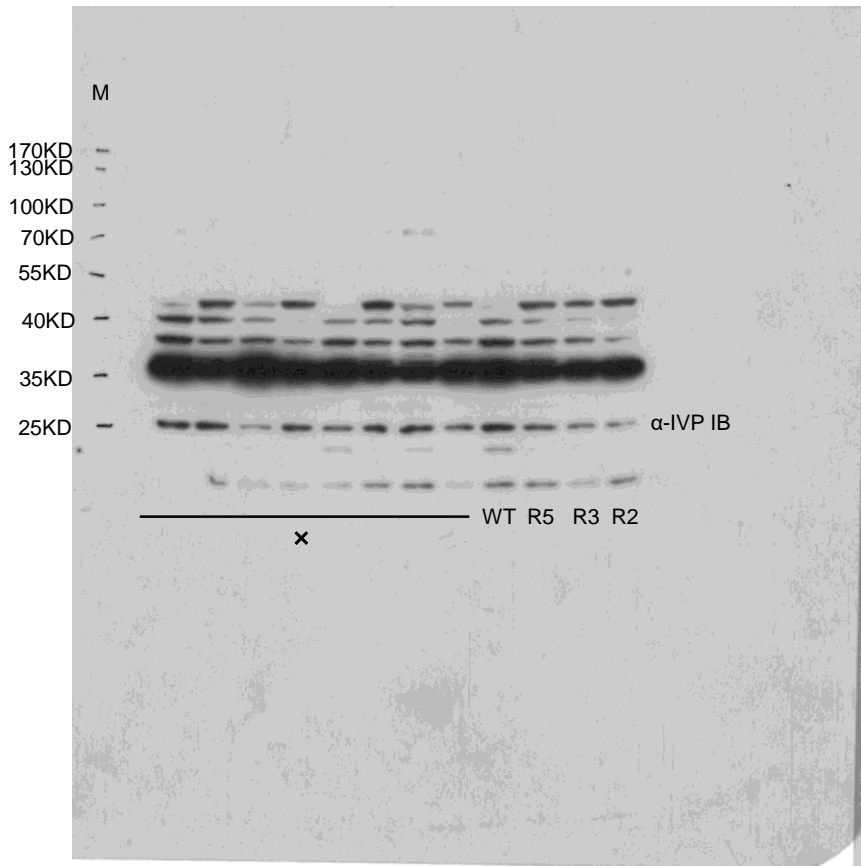

Immunoblots of transgenic lines R5, R3, and R2.

Fig 3D

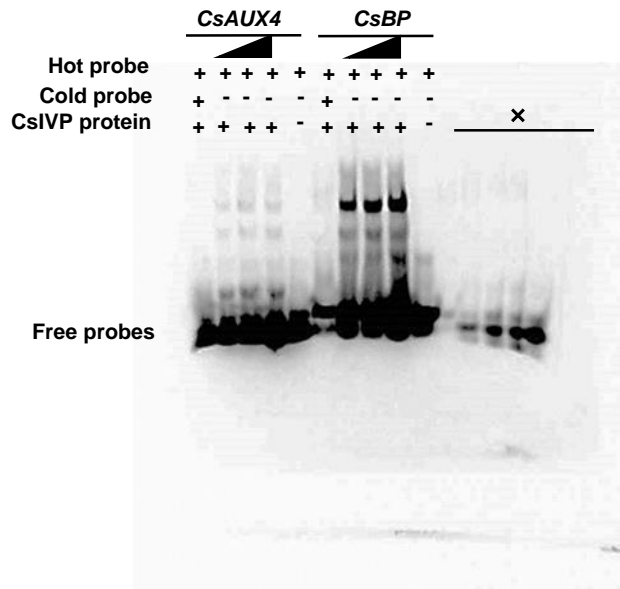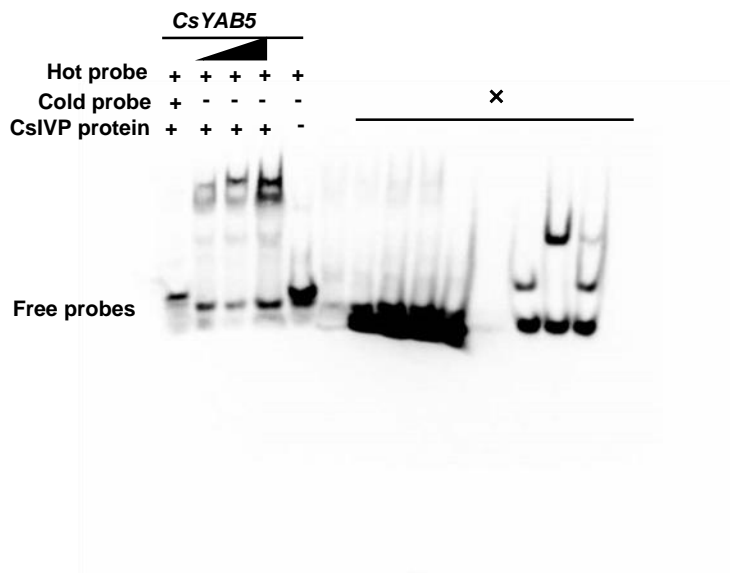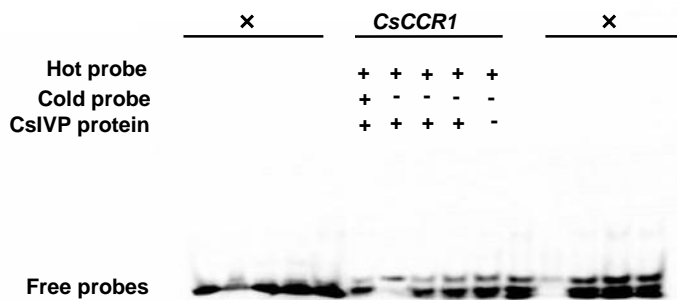

Visualization of direct binding of CsIVP to promoters of *CsYAB5*, *CsBP*, *CsAUX4* and *CsCCR1* via electrophoretic mobility-shift assays.

Fig S6D

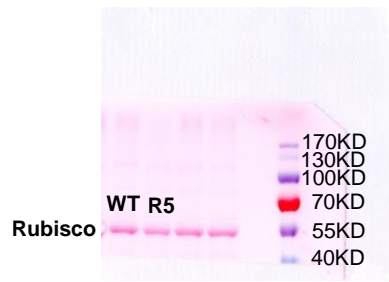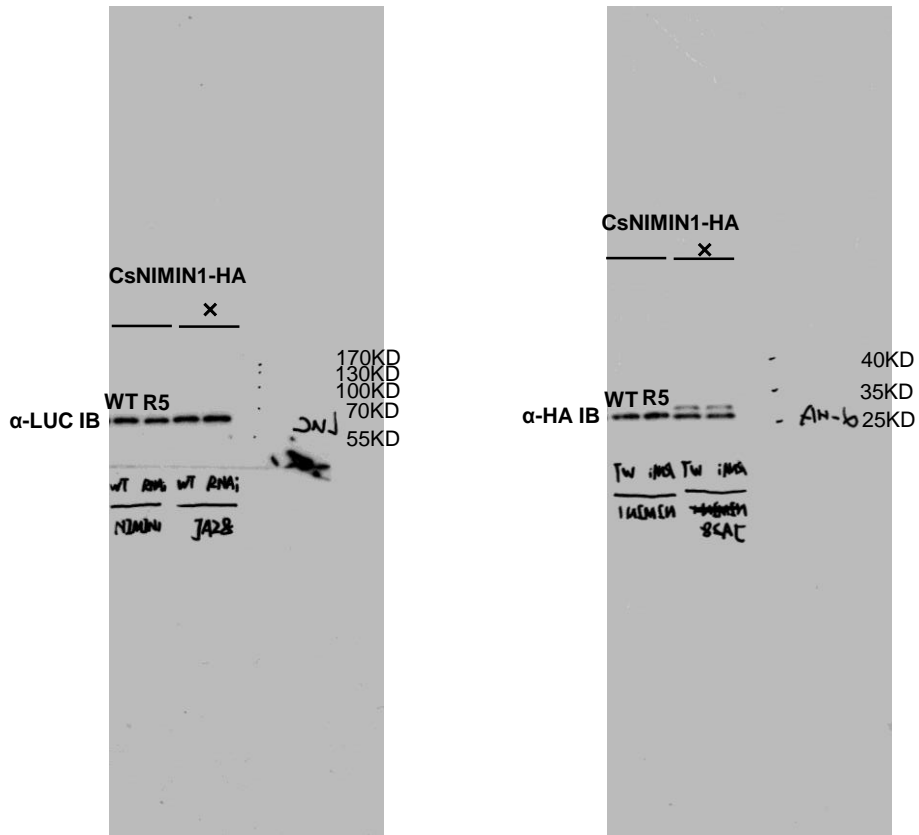

Immunoblots in protoplasts of WT and R5 transgenic plants that overexpressing CsNIMIN1-HA.
